# Supplementary material for: Biogeochemical impact of cable bacteria on coastal Black Sea sediment
Source: Copernicus journal article supplement (doi:10.5194/bg-17-5919-2020), 2020-12-02
Supplement: Supplementary file 1 [file bg-17-5919-2020-supplement.zip]

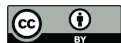

## *Supplement of*

# **Biogeochemical impact of cable bacteria on coastal Black Sea sediment**

**Martijn Hermans et al.**

*Correspondence to:* Martijn Hermans ([martijn.hermans@helsinki.fi](mailto:martijn.hermans@helsinki.fi))

- [bg-17-5919-2020-supplement-title-page.pdf](#)
- [Research Data - Biogeochemical Impact of Cable Bacteria on Coastal Black Sea Sediment.xlsx](#)
- [Supplement.pdf](#)

The copyright of individual parts of the supplement might differ from the CC BY 4.0 License.
