# Supplementary material for: Biogeochemical impact of cable bacteria on coastal Black Sea sediment
Source: Copernicus journal article supplement (doi:10.5194/bg-17-5919-2020), 2020-12-02
Supplement: Supplementary file 2 [file bg-17-5919-2020-supplement.zip]

# Supporting Information:

## Biogeochemical Impact of Cable Bacteria in Coastal Black Sea Sediment

*Martijn Hermans,<sup>1,2</sup> Nils Risgaard-Petersen,<sup>3,4</sup> Filip J.R. Meysman,<sup>5,6</sup> and Caroline P. Slomp<sup>1</sup>*

<sup>1</sup>Department of Earth Sciences, Faculty of Geosciences, Utrecht University, 3584 CB Utrecht, the Netherlands

<sup>2</sup>Now at: Aquatic Biogeochemistry Research Unit (ABRU), Ecosystems and Environment Research Programme, Faculty of Biological and Environmental Sciences, University of Helsinki, 00790 Helsinki, Finland

<sup>3</sup>Center for Geomicrobiology, Section for Microbiology, Department of Bioscience, Aarhus University, 8000 Aarhus, Denmark

<sup>4</sup>Center for Electromicrobiology, Section for Microbiology, Department of Bioscience, Aarhus University, 8000 Aarhus, Denmark

<sup>5</sup>Center of Excellence for Microbial Systems Technology, Department of Biology, University of Antwerp, 2610 Wilrijk, Belgium

<sup>6</sup>Department of Biotechnology, Delft University of Technology, 2629 HZ Delft, the Netherlands

### S1.1. Porosity

**Table S1.** Depth profile of the porosity calculated from the water loss upon freeze-drying and sediment density following Burdige (2006) for one core.

| Depth [cm] |   |     | Porosity [vol vol <sup>-1</sup> ] |
|------------|---|-----|-----------------------------------|
| 0          | - | 0.5 | 0.90                              |
| 0.5        | - | 1   | 0.89                              |
| 1          | - | 1.5 | 0.89                              |
| 1.5        | - | 2   | 0.90                              |
| 2          | - | 2.5 | 0.84                              |
| 2.5        | - | 3   | 0.84                              |
| 3          | - | 3.5 | 0.81                              |
| 3.5        | - | 4   | 0.81                              |
| 4          | - | 4.5 | 0.81                              |
| 4.5        | - | 5   | 0.81                              |

## S1.2. Sequential Extractions

**Table S2.** Sequential extraction scheme for Fe, S and P.

| Extracted mineral phase                                                                                                        | Solvent                                                                                          | Time   |
|--------------------------------------------------------------------------------------------------------------------------------|--------------------------------------------------------------------------------------------------|--------|
| <b>Sequential Fe extraction<sup>1,2</sup></b>                                                                                  |                                                                                                  |        |
| 1 Labile ferric Fe oxides (ferrihydrite, akaganéite and lepidocrocite)<br>ferrous Fe (FeS and FeCO <sub>3</sub> ) <sup>1</sup> | 1 M HCl                                                                                          | 4 h    |
| 2 Crystalline Fe oxides <sup>1</sup>                                                                                           | 0.35 M acetic acid / 0.2 M sodium citrate<br>with 50 g L <sup>-1</sup> sodium dithionite, pH 4.8 | 4 h    |
| 3 Magnetite <sup>2</sup>                                                                                                       | 0.2 M / 0.14 M                                                                                   | 6 h    |
| 4 Pyrite <sup>1</sup>                                                                                                          | HNO <sub>3</sub> (65-70%)                                                                        | 2 h    |
| <b>Sequential S extraction<sup>3,4</sup></b>                                                                                   |                                                                                                  |        |
| 1 Acid volatile sulphur (AVS)                                                                                                  | 6 M HCl                                                                                          | 24 h   |
| 2 Elemental sulphur (S <sub>0</sub> )                                                                                          | Methanol (99.8%)                                                                                 | 16 h   |
| 3 Chromium reducible sulfur (CRS)                                                                                              | 500 g/L chromous chloride in 32% HCl                                                             | 48 h   |
| <b>Sequential P extraction<sup>5</sup></b>                                                                                     |                                                                                                  |        |
| 1 Exchangeable P                                                                                                               | 1 M MgCl <sub>2</sub> to pH 8                                                                    | 30 min |
| 2 Easily reducible or reactive ferric Fe-bound P (CDB-P)                                                                       | Citrate-bicarbonate-CDB buffered to pH 7.5<br>with sodium citrate / sodium bicarbonate           | 8 h    |
|                                                                                                                                | 1 M MgCl <sub>2</sub> to pH 8 (wash step)                                                        | 30 min |
| 3 Authigenic P                                                                                                                 | 1 M sodium acetate buffered to pH 4 with<br>acetic acid                                          | 6 h    |
|                                                                                                                                | 1 M MgCl <sub>2</sub> to pH 8 (wash step)                                                        | 30 min |
| 4 Detrital P                                                                                                                   | 1 M HCl                                                                                          | 24 h   |
| 5 Organic P                                                                                                                    | 1 M HCl, after ashing at 550 °C                                                                  | 24 h   |

<sup>1</sup> Claff et al. (2010)

<sup>2</sup> Poulton and Canfield (2005)

<sup>3</sup> Burton et al. (2006)

<sup>4</sup> Burton et al. (2008)

<sup>5</sup> Ruttenberg (1992) as modified by Slomp et al. (1996)

### S1.3. FISH Image of Filamentous Cable Bacteria

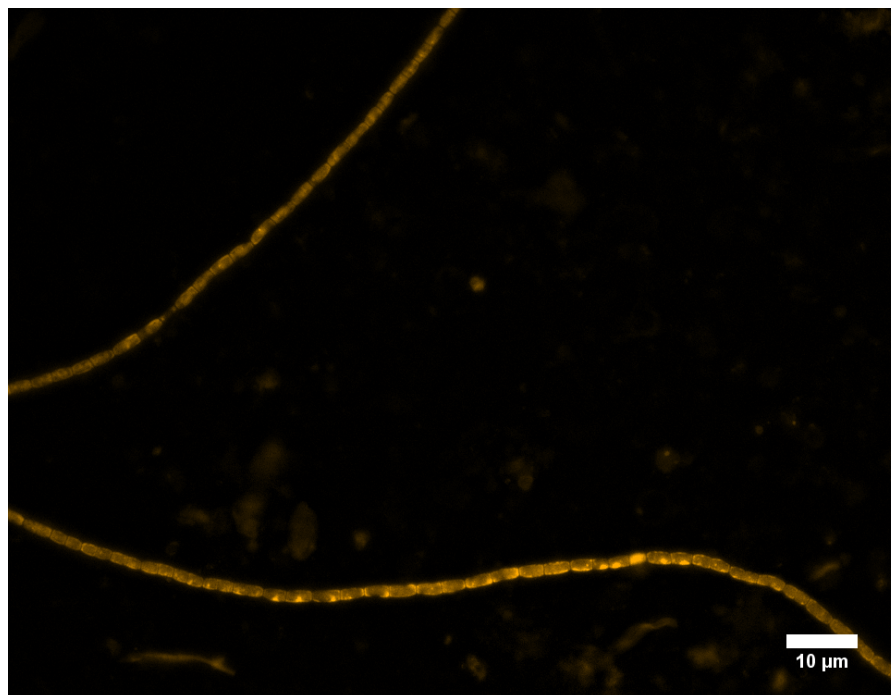

**Figure S1.** Microscopic FISH image of two cable bacteria filaments. These filaments were extracted from the surface sediment 207 days after the start of the incubation experiment. The white scale bar denotes a distance of 10  $\mu\text{m}$ .

S1.4. Time-series of Oxygen Penetration Depth

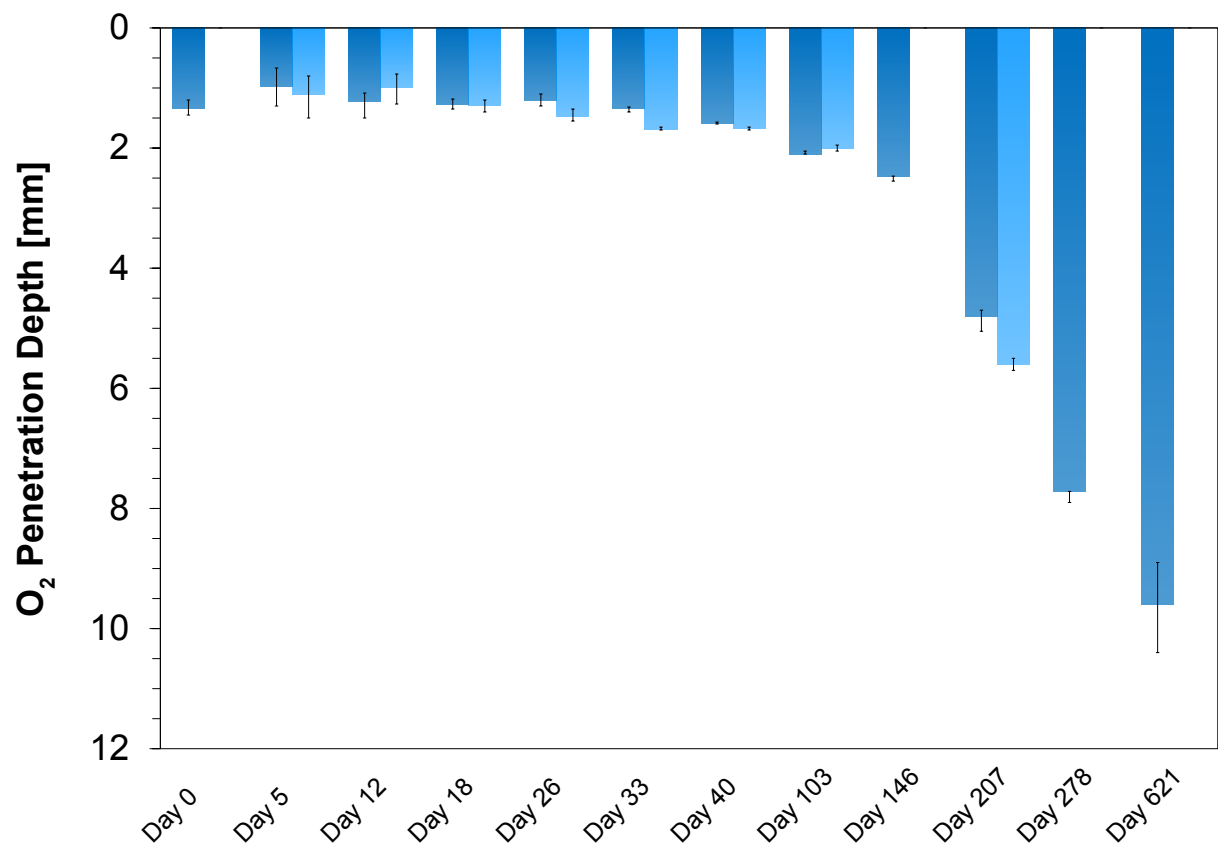

**Figure S2.** Time-series of the O<sub>2</sub> penetration depth in the surface sediment in mm in two sediment cores. These O<sub>2</sub> penetration depths represent the average value of 3 replicate measurements per core. The error bars represent the minimum and maximum O<sub>2</sub> penetration depths.

### S1.5. Anoxic Control Core

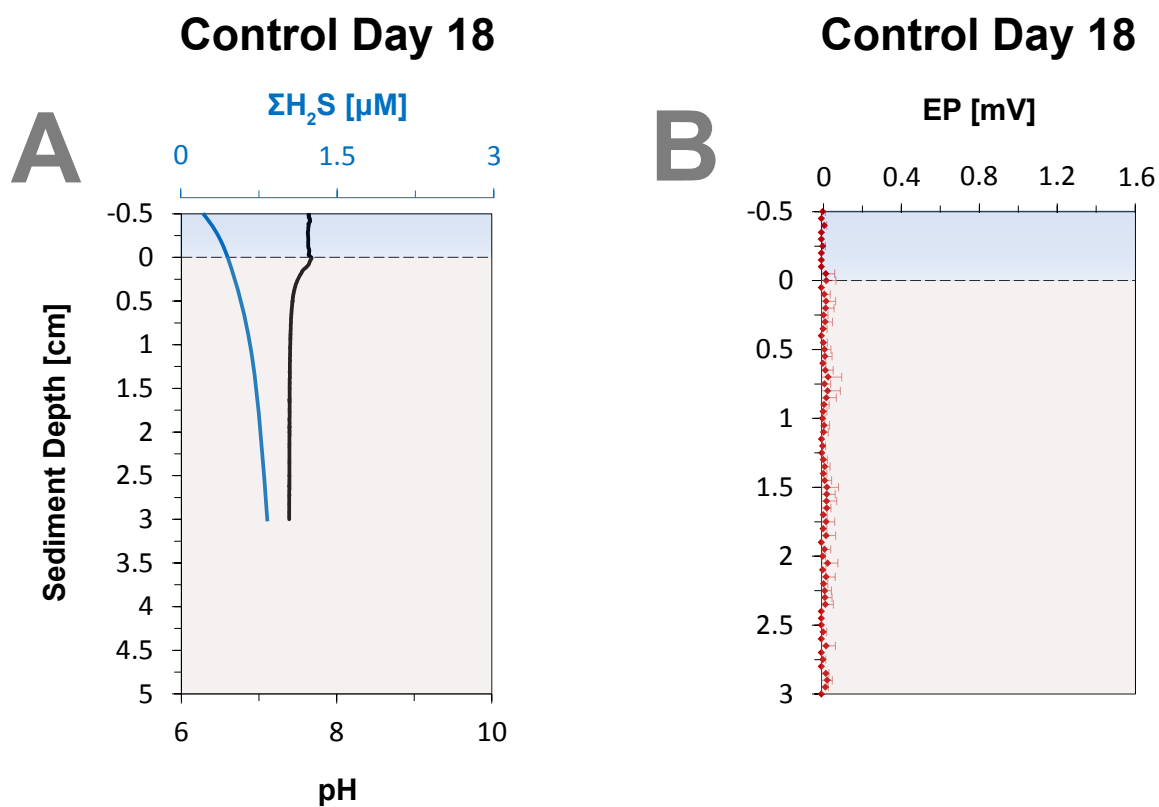

**Figure S3.** pH and  $\Sigma\text{H}_2\text{S}$  and EP for the anoxic control core at day 18. The pore water depth profiles for the other time points look similar.

**S1.6. Linear Pore Water Gradients of  $\text{NH}_4^+$ ,  $\text{SO}_4^{2-}$ ,  $\text{Fe}^{2+}$ ,  $\text{Mn}^{2+}$ ,  $\text{Ca}^{2+}$  and  $\text{H}_4\text{SiO}_4$  used for Diffusive Fluxes**

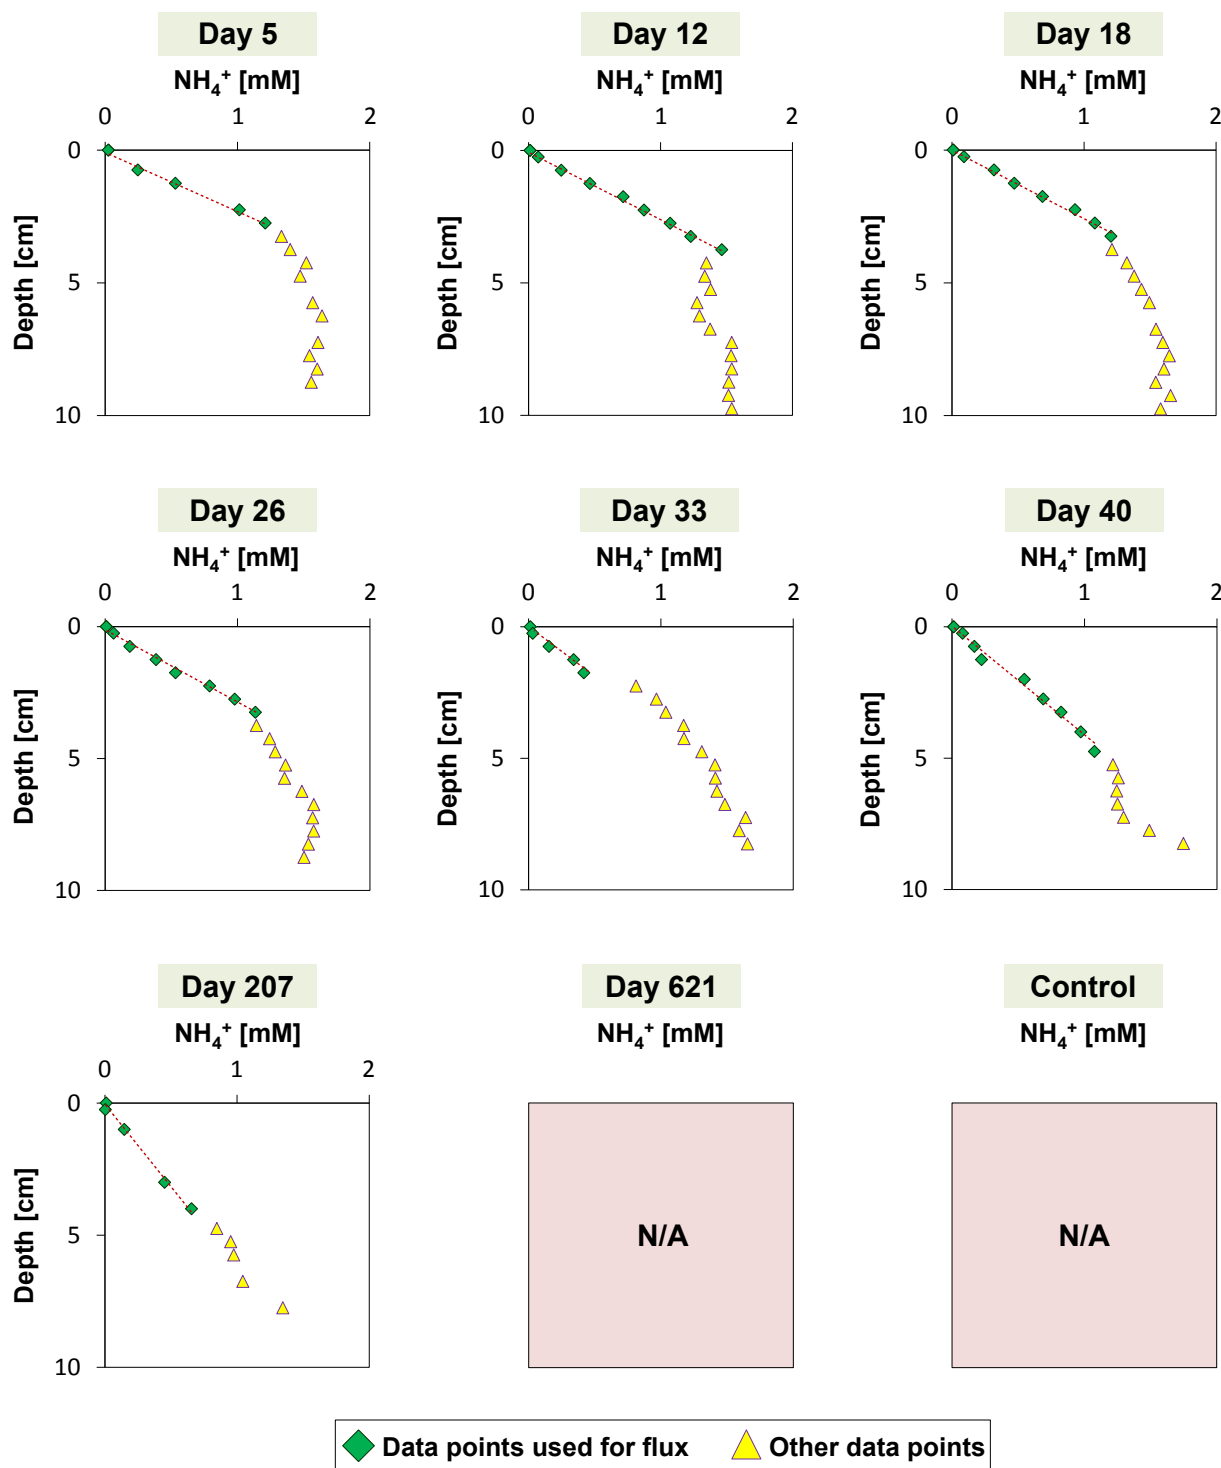

**Figure S4.** Time-series of pore water depth profiles of  $\text{NH}_4^+$ . The linear gradient in the green and cyan diamonds represents data points that were used for the calculation of the upward  $\text{NH}_4^+$  flux, whereas the yellow and pink triangles are data points that were not used for this calculation.

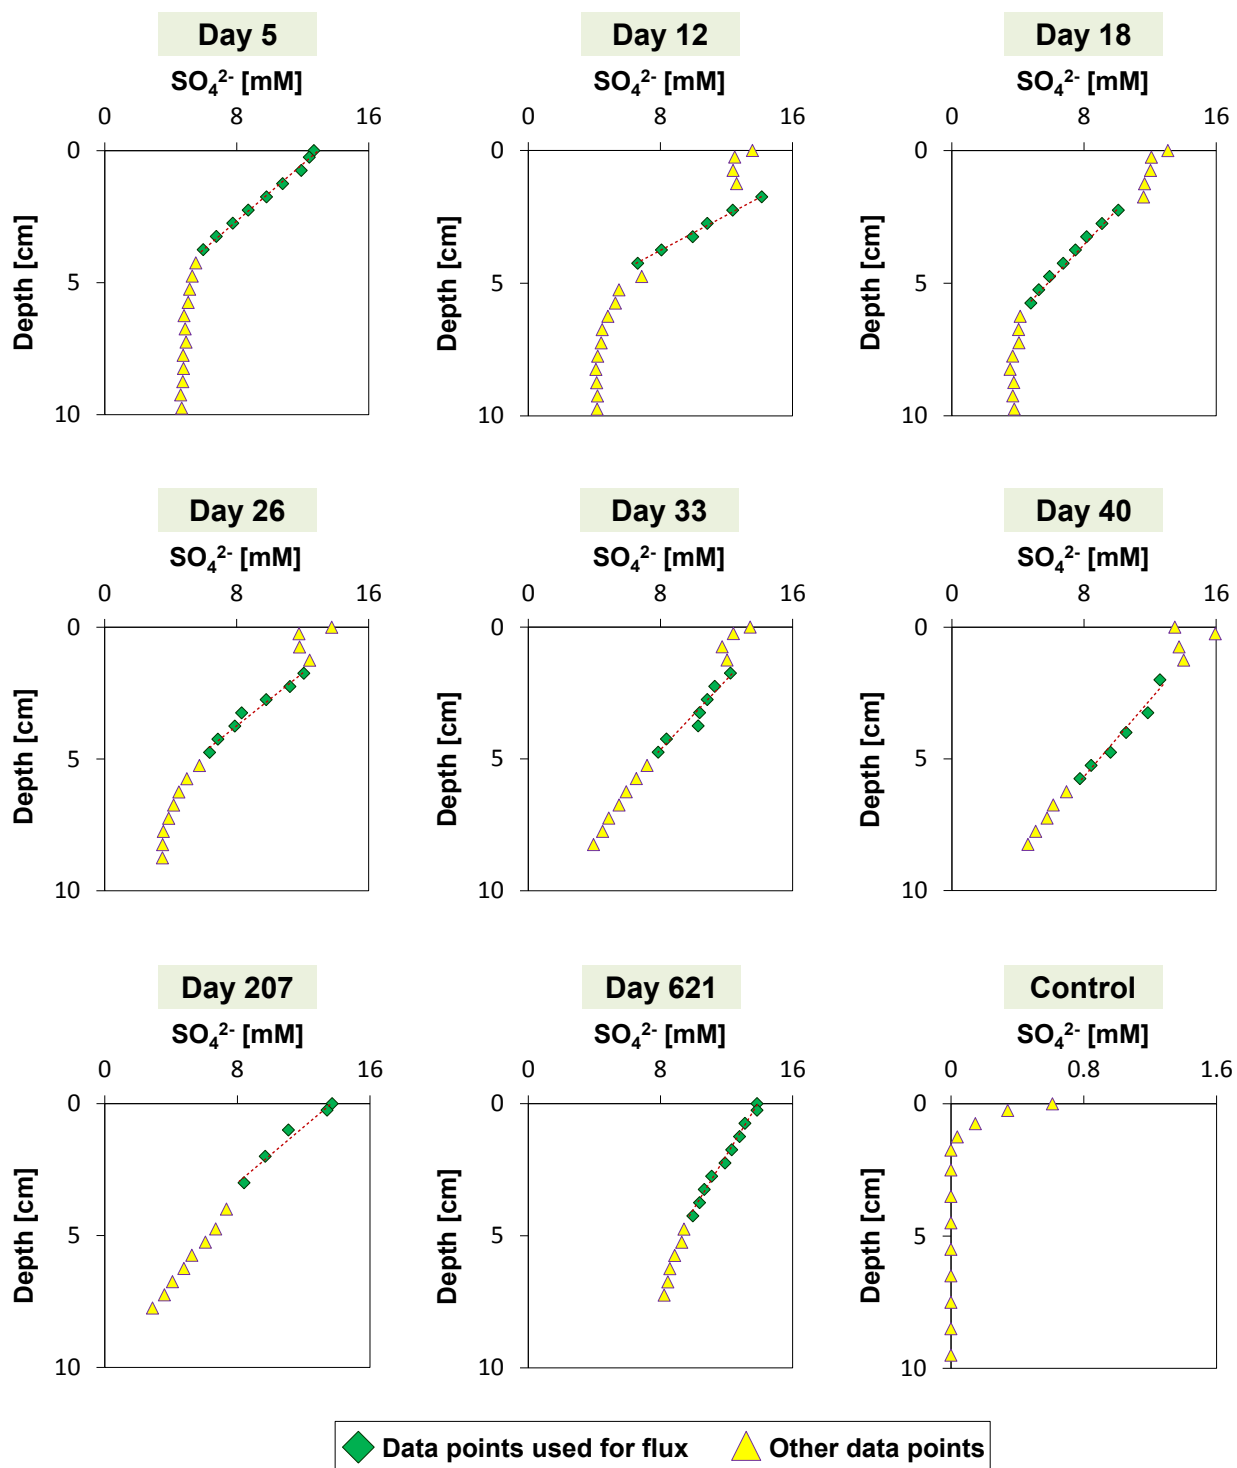

**Figure S5.** Time-series of pore water depth profiles of  $\text{SO}_4^{2-}$ . The linear gradient in the green diamonds represents data points that were used for the calculation of the downward  $\text{SO}_4^{2-}$  flux, whereas the yellow triangles are data points that were not used for this calculation.



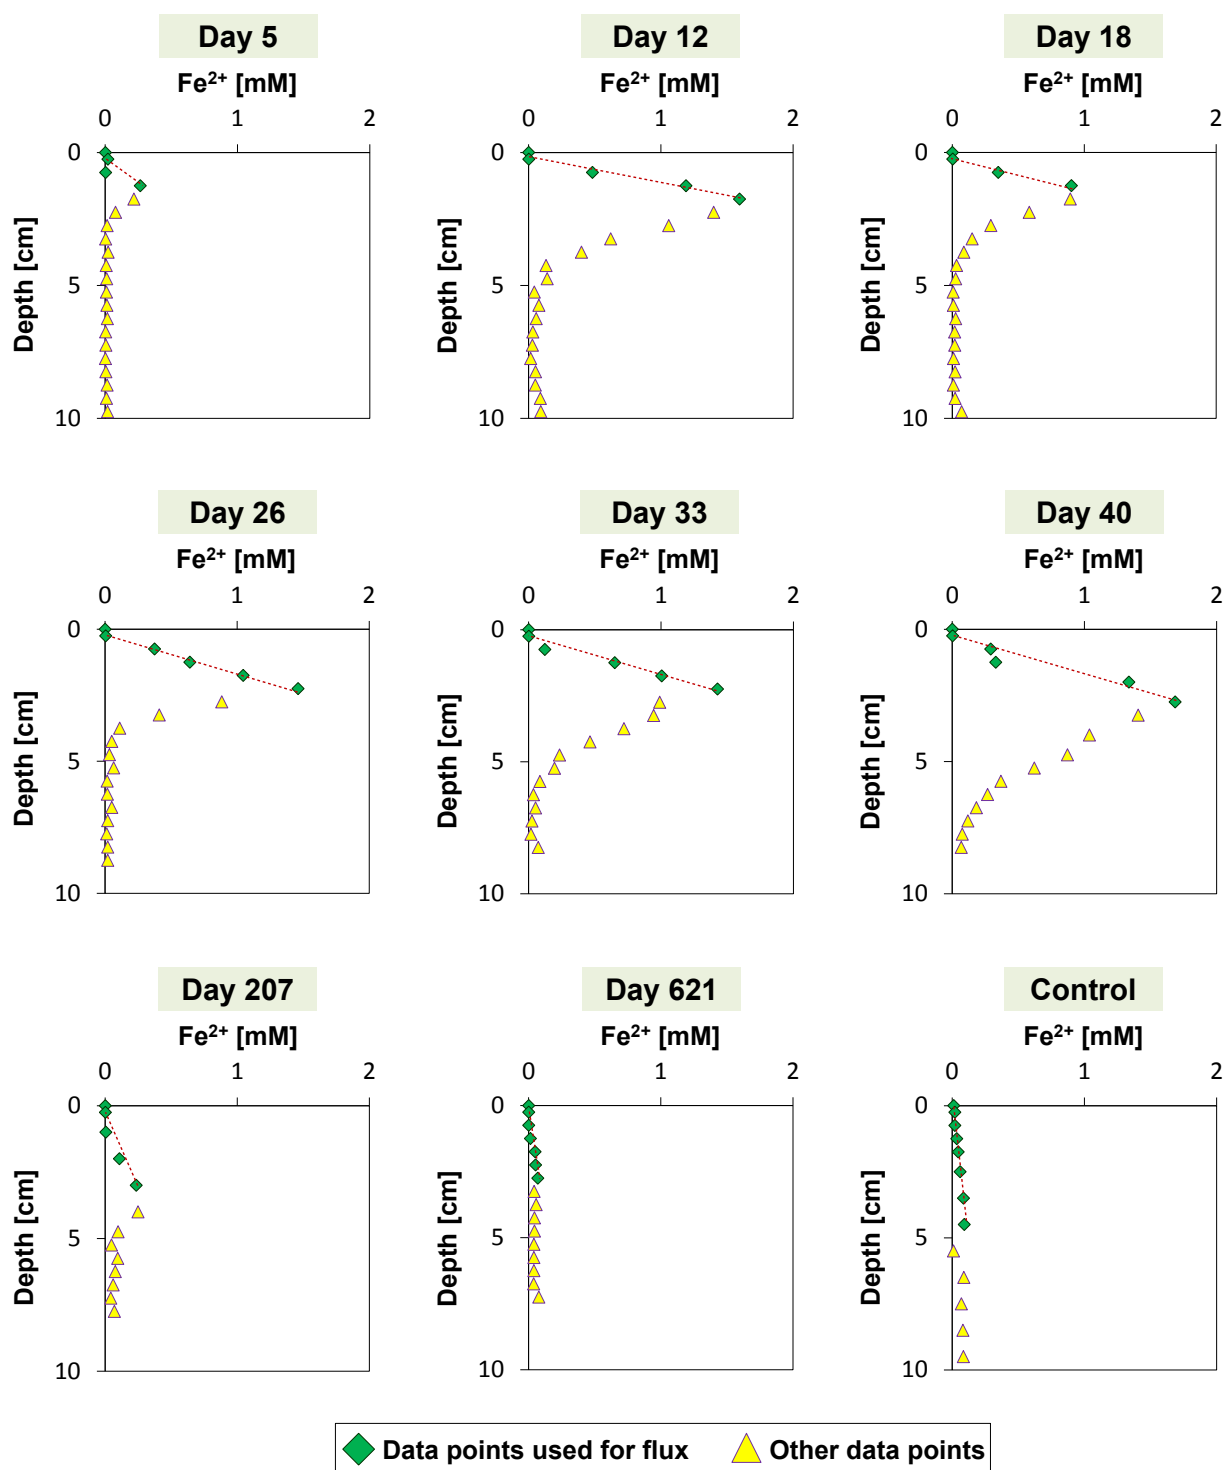

**Figure S6.** Time-series of pore water depth profiles of dissolved  $\text{Fe}^{2+}$ . The linear gradient in the green diamonds represents data points that were used for the calculation of the upward  $\text{Fe}^{2+}$  flux, whereas the yellow triangles are data points that were not used for this calculation.

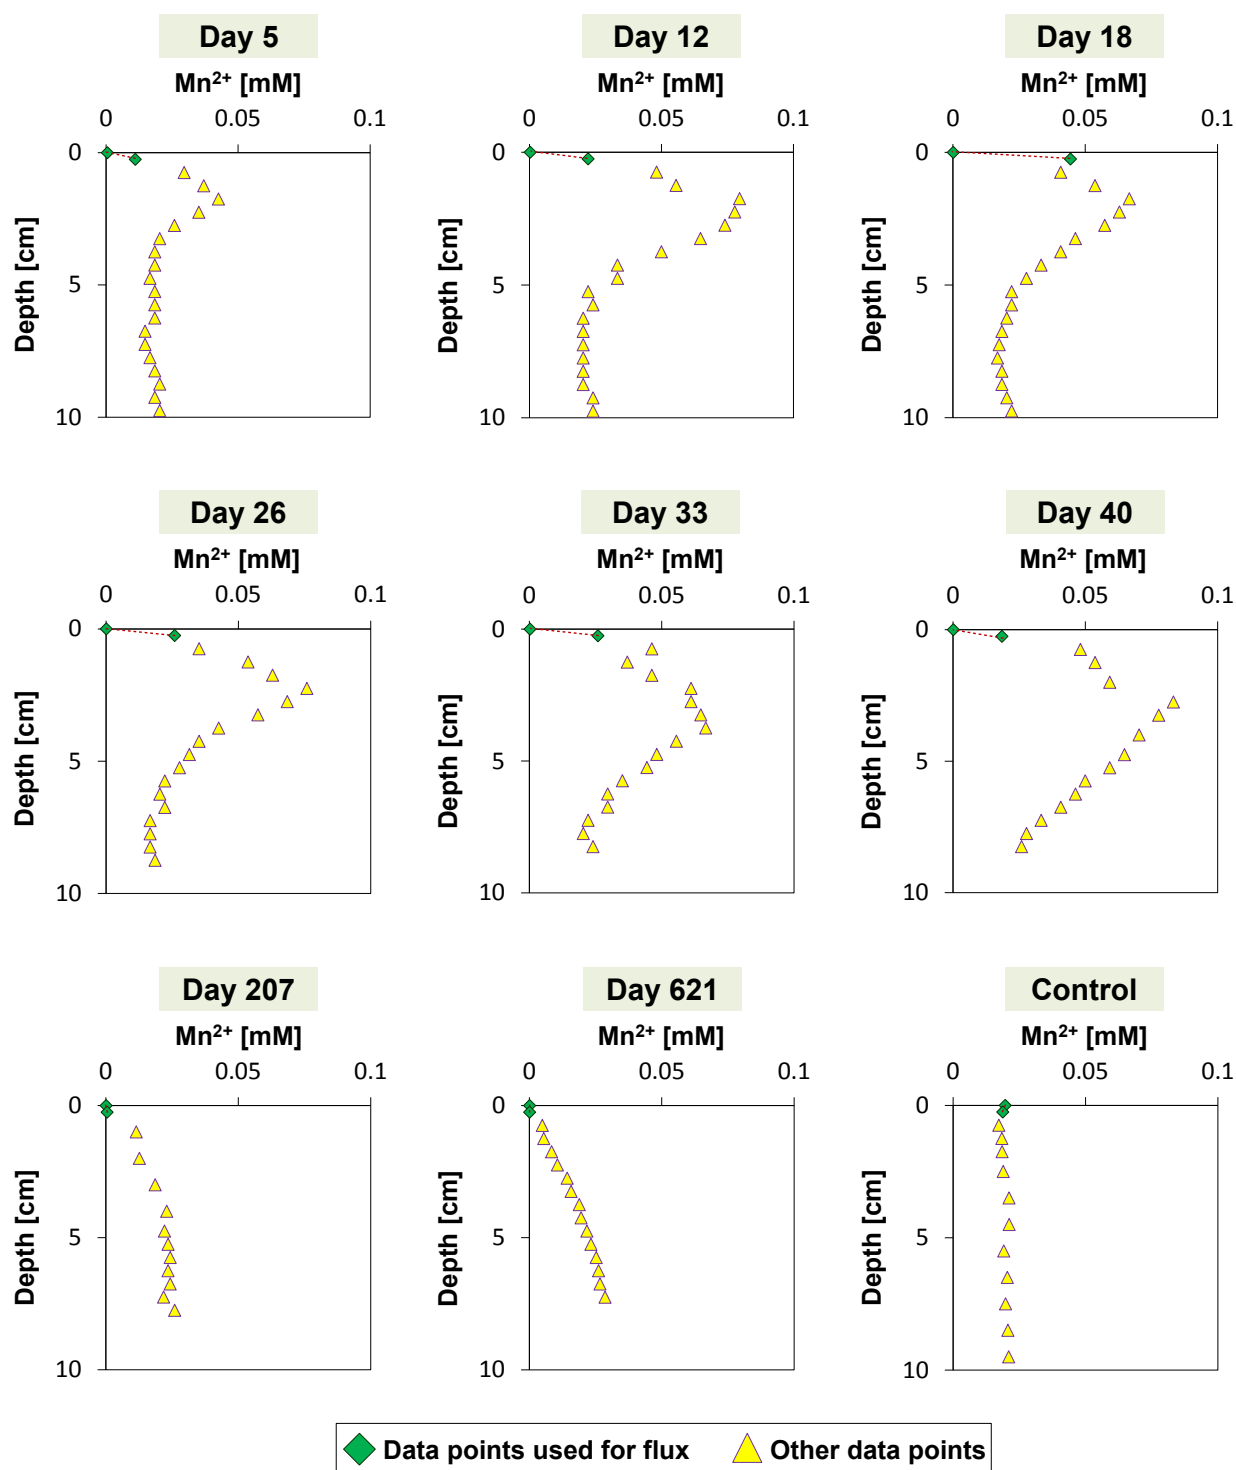

**Figure S7.** Time-series of pore water depth profiles of dissolved  $\text{Mn}^{2+}$ . The linear gradient in the green diamonds represents data points that were used for the calculation of the upward  $\text{Mn}^{2+}$  flux, whereas the yellow triangles are data points that were not used for this calculation.

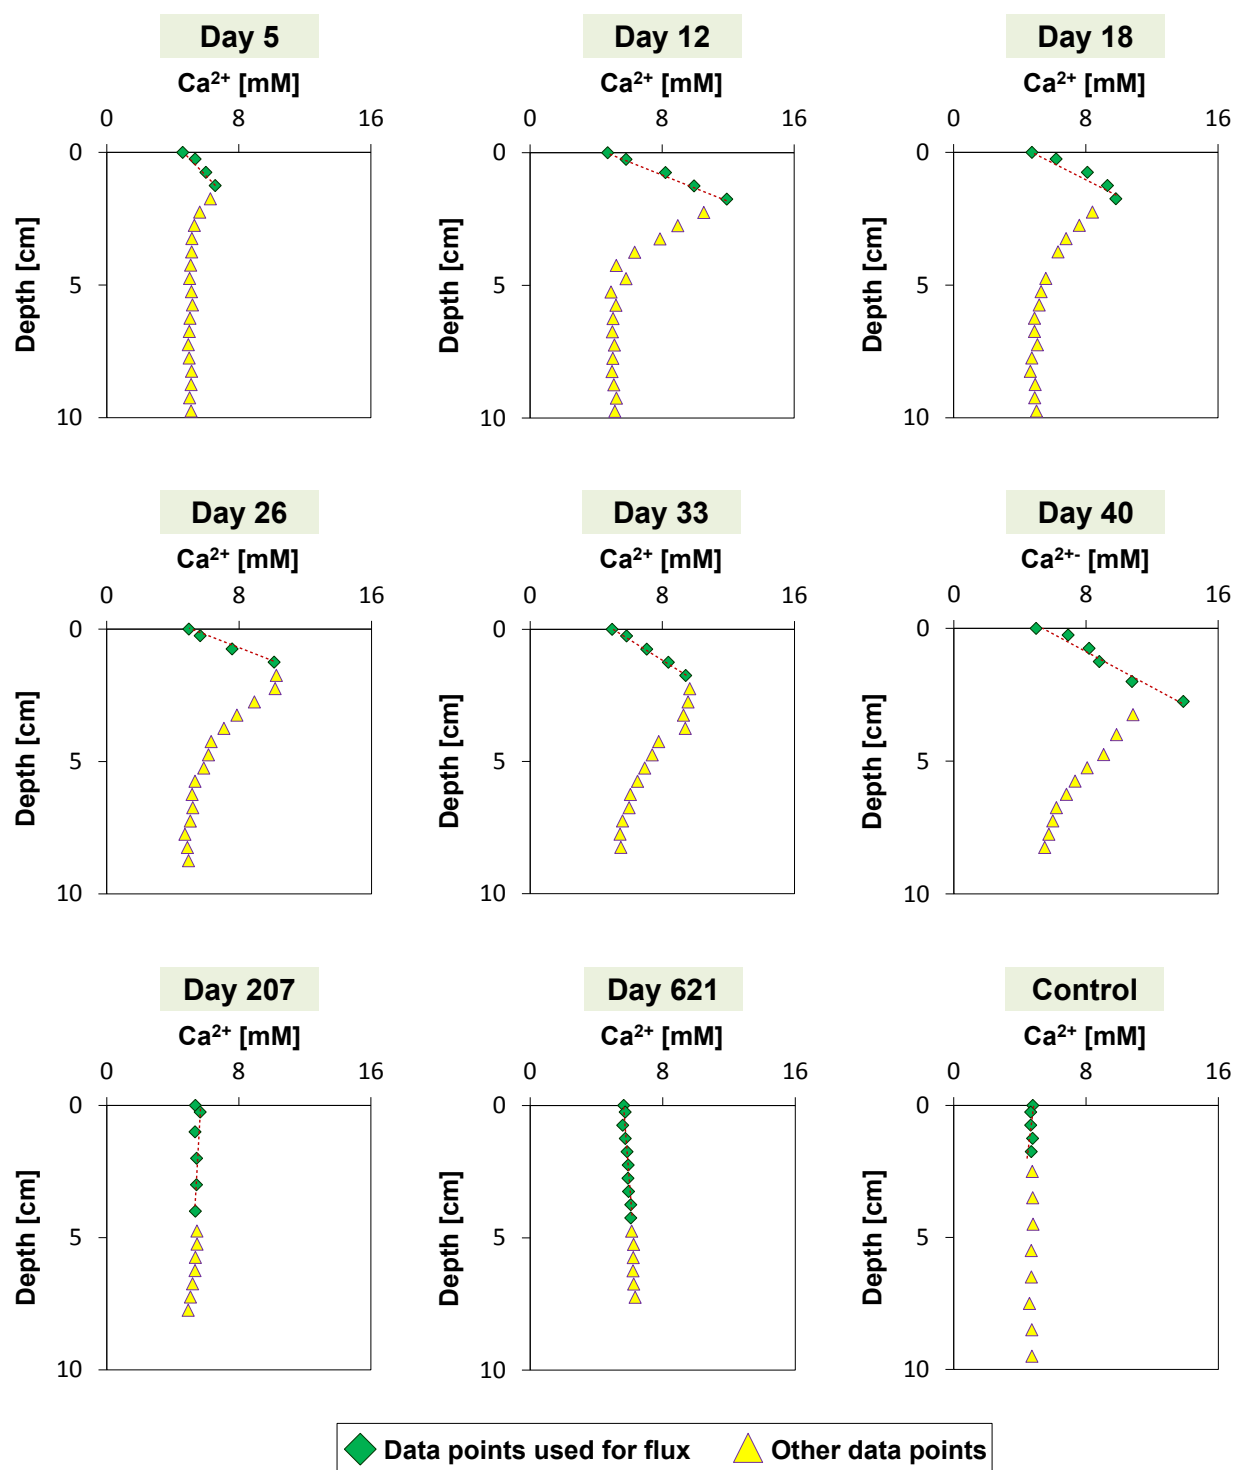

**Figure S8.** Time-series of pore water depth profiles of dissolved  $\text{Ca}^{2+}$ . The linear gradient in the green diamonds represents data points that were used for the calculation of the upward  $\text{Ca}^{2+}$  flux, whereas the yellow triangles are data points that were not used for this calculation.

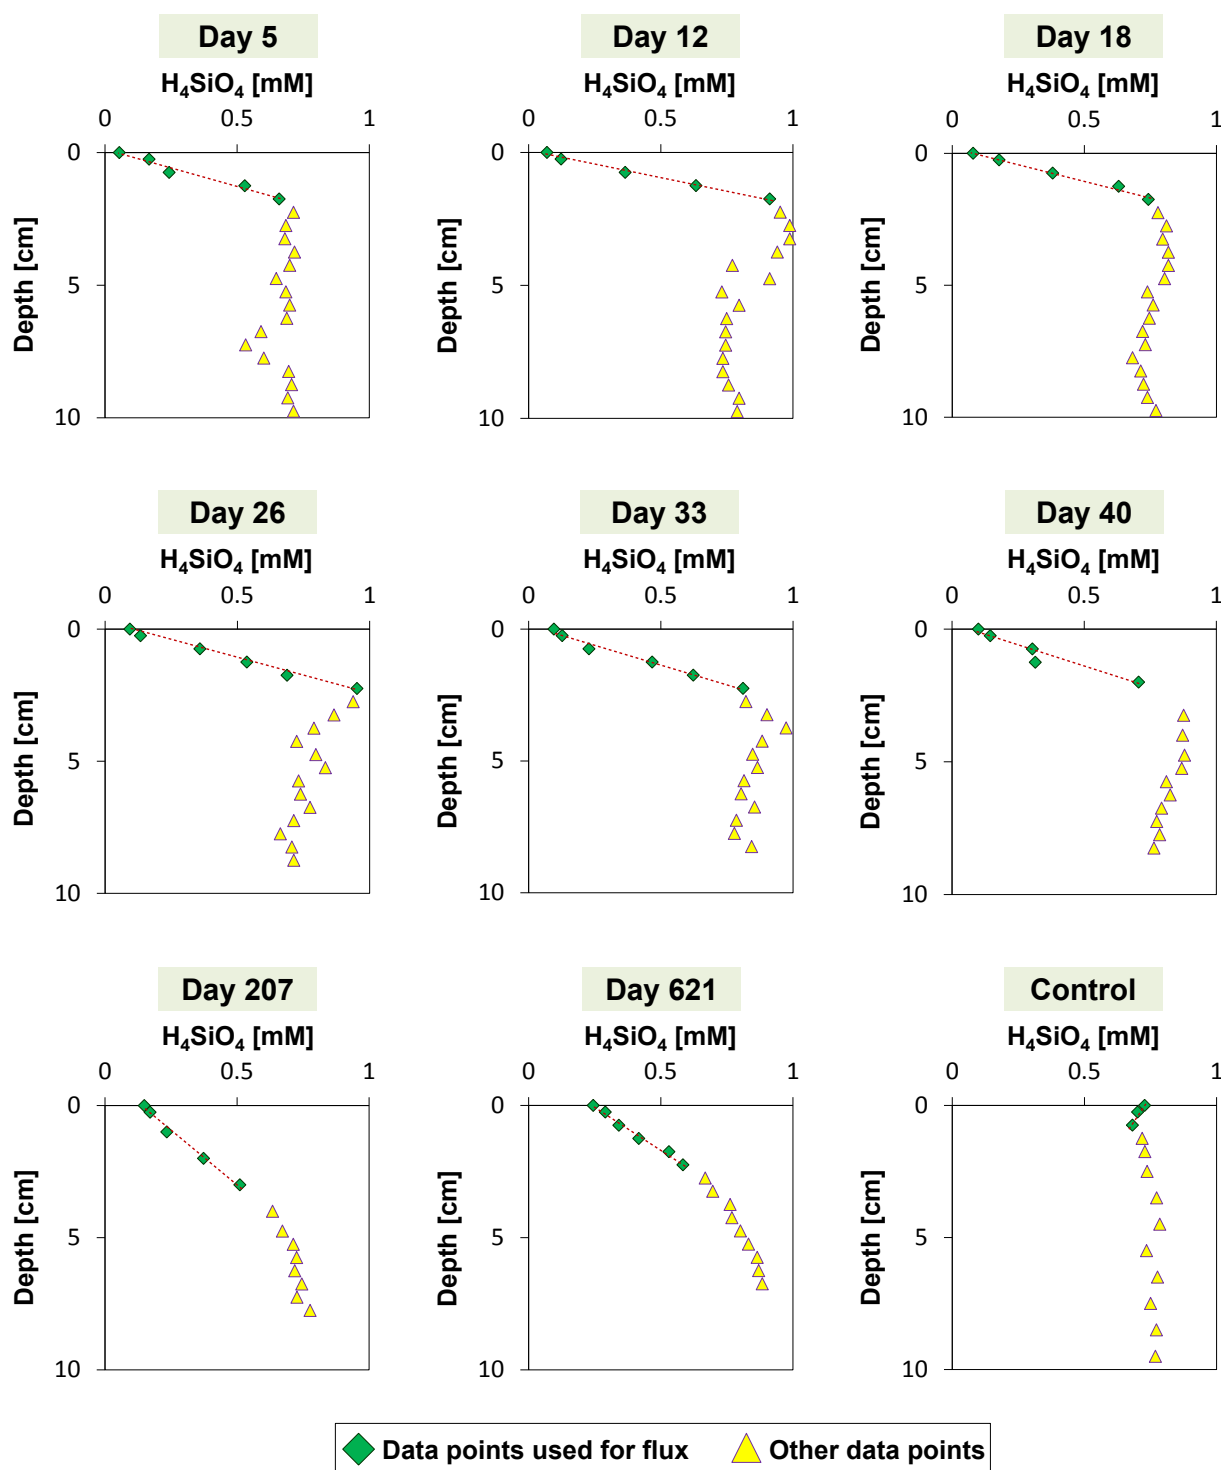

**Figure S9.** Time-series of pore water depth profiles of dissolved  $\text{H}_4\text{SiO}_4$ . The linear gradient in the green diamonds represents data points that were used for the calculation of the upward  $\text{H}_4\text{SiO}_4$  flux, whereas the yellow triangles are data points that were not used for this calculation.

**Table S3.** Diffusive fluxes of  $\text{NH}_4^+$ ,  $\text{SO}_4^{2-}$ ,  $\text{Fe}^{2+}$ ,  $\text{Mn}^{2+}$ ,  $\text{Ca}^{2+}$  and  $\text{H}_4\text{SiO}_4$  in  $\text{mmol m}^{-2} \text{d}^{-1}$ . Positive values indicate an upward flux, whereas negative values represent a downward flux.

|                   | $\text{NH}_4^+$<br>( $\text{mmol m}^{-2} \text{d}^{-1}$ ) | $\text{SO}_4^{2-}$<br>( $\text{mmol m}^{-2} \text{d}^{-1}$ ) | $\text{Fe}^{2+}$<br>( $\text{mmol m}^{-2} \text{d}^{-1}$ ) | $\text{Mn}^{2+}$<br>( $\text{mmol m}^{-2} \text{d}^{-1}$ ) | $\text{Ca}^{2+}$<br>( $\text{mmol m}^{-2} \text{d}^{-1}$ ) | $\text{H}_4\text{SiO}_4$<br>( $\text{mmol m}^{-2} \text{d}^{-1}$ ) |
|-------------------|-----------------------------------------------------------|--------------------------------------------------------------|------------------------------------------------------------|------------------------------------------------------------|------------------------------------------------------------|--------------------------------------------------------------------|
| Day 5             | 4.71                                                      | -10.49                                                       | 0.82                                                       | 0.16                                                       | 6.95                                                       | 2.01                                                               |
| Day 12            | 4.23                                                      | -17.60                                                       | 3.54                                                       | 0.34                                                       | 18.23                                                      | 2.80                                                               |
| Day 18            | 4.02                                                      | -8.87                                                        | 2.80                                                       | 0.68                                                       | 12.83                                                      | 2.20                                                               |
| Day 26            | 3.79                                                      | -11.15                                                       | 2.52                                                       | 0.40                                                       | 18.20                                                      | 2.22                                                               |
| Day 33            | 2.53                                                      | -8.54                                                        | 2.46                                                       | 0.40                                                       | 11.25                                                      | 1.85                                                               |
| Day 40            | 2.44                                                      | -7.57                                                        | 2.38                                                       | 0.28                                                       | 14.33                                                      | 1.76                                                               |
| Day 207           | 1.76                                                      | -10.38                                                       | 0.32                                                       | 0.01                                                       | 0.00                                                       | 0.70                                                               |
| Day 621           | N/A                                                       | -5.36                                                        | 0.10                                                       | 0.00                                                       | 0.45                                                       | 0.88                                                               |
| Control (Day 621) | N/A                                                       | N/A                                                          | 0.07                                                       | 0.00                                                       | -0.23                                                      | -0.36                                                              |

## S1.7. Solute Fluxes

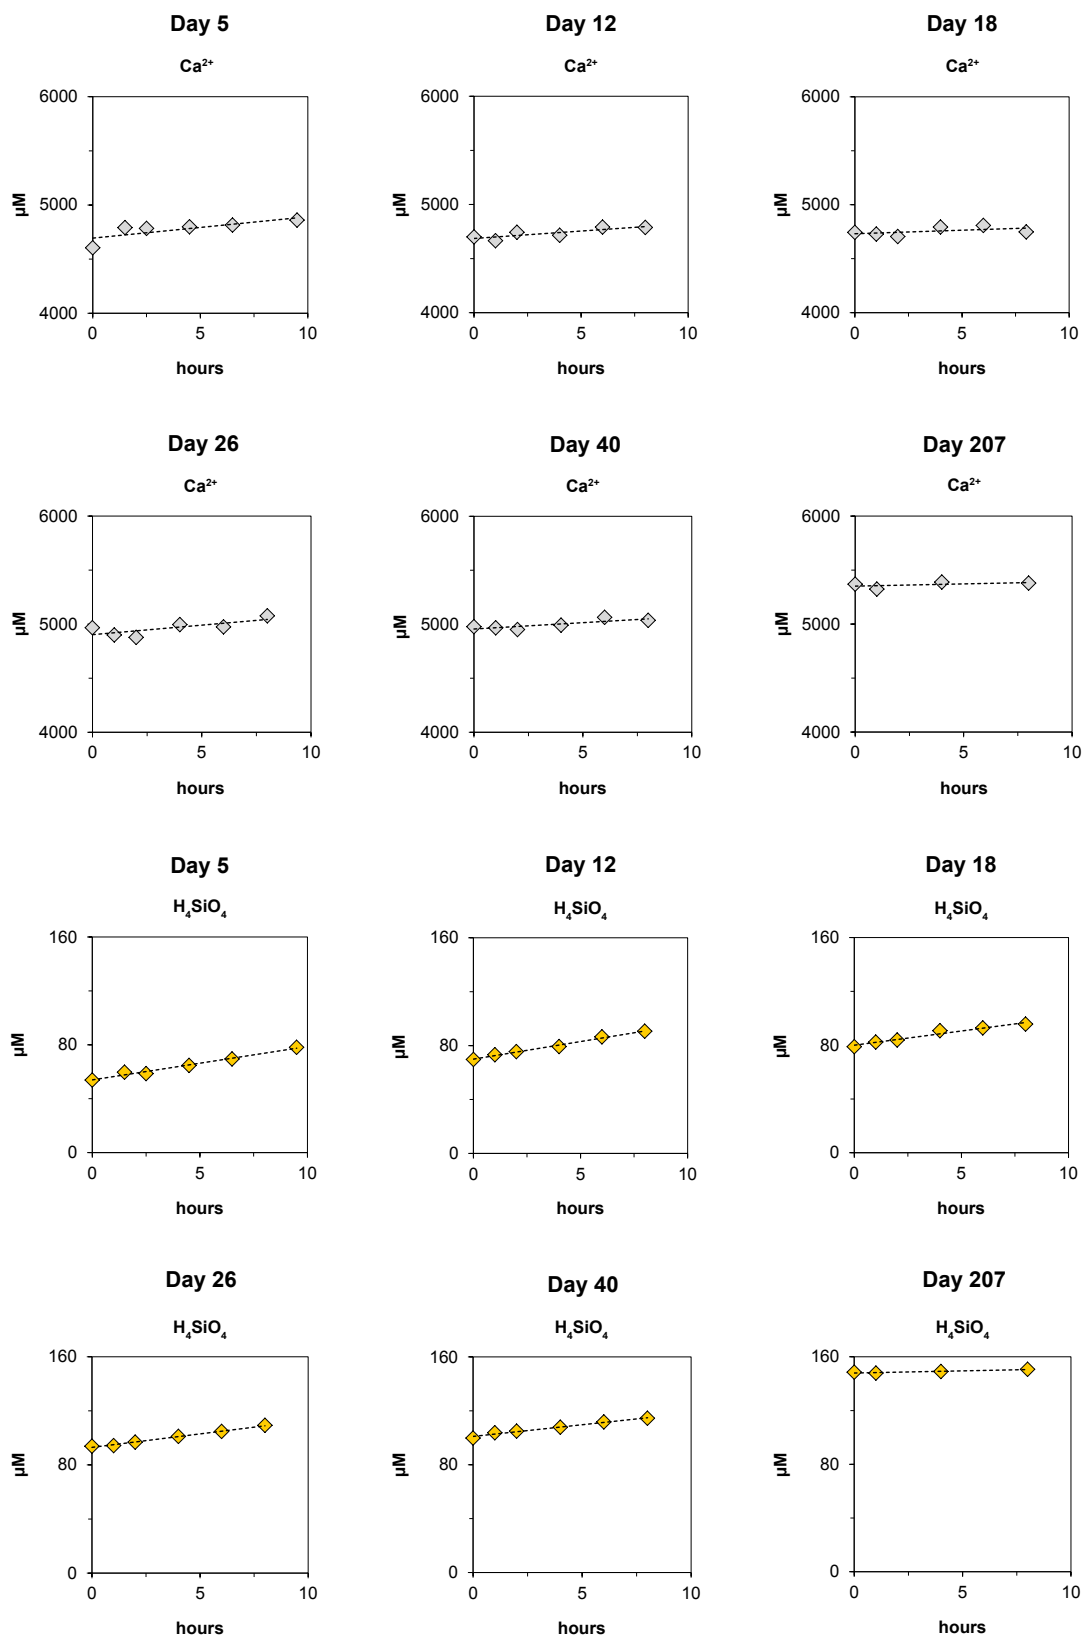

**Figure S10.** Concentrations of  $\text{Ca}^{2+}$  and  $\text{H}_4\text{SiO}_4$  in the overlying water during solute flux incubations over an 8 hour time period for day 5, 12, 18, 26, 40 and 207. The linear gradient was used for the calculation of the fluxes.

**Table S4.** Solute fluxes of  $\text{Ca}^{2+}$  and  $\text{H}_4\text{SiO}_4$  in  $\text{mmol m}^{-2} \text{d}^{-1}$ .

|         | $\text{Ca}^{2+}$<br>( $\text{mmol m}^{-2} \text{d}^{-1}$ ) | $\text{H}_4\text{SiO}_4$<br>( $\text{mmol m}^{-2} \text{d}^{-1}$ ) |
|---------|------------------------------------------------------------|--------------------------------------------------------------------|
| Day 5   | 19.38                                                      | 1.84                                                               |
| Day 12  | 7.88                                                       | 1.89                                                               |
| Day 18  | 0.46                                                       | 1.51                                                               |
| Day 26  | 9.95                                                       | 1.39                                                               |
| Day 40  | 5.27                                                       | 1.33                                                               |
| Day 207 | 0.88                                                       | 0.20                                                               |

**S1.8. Time-series of Core Photographs**

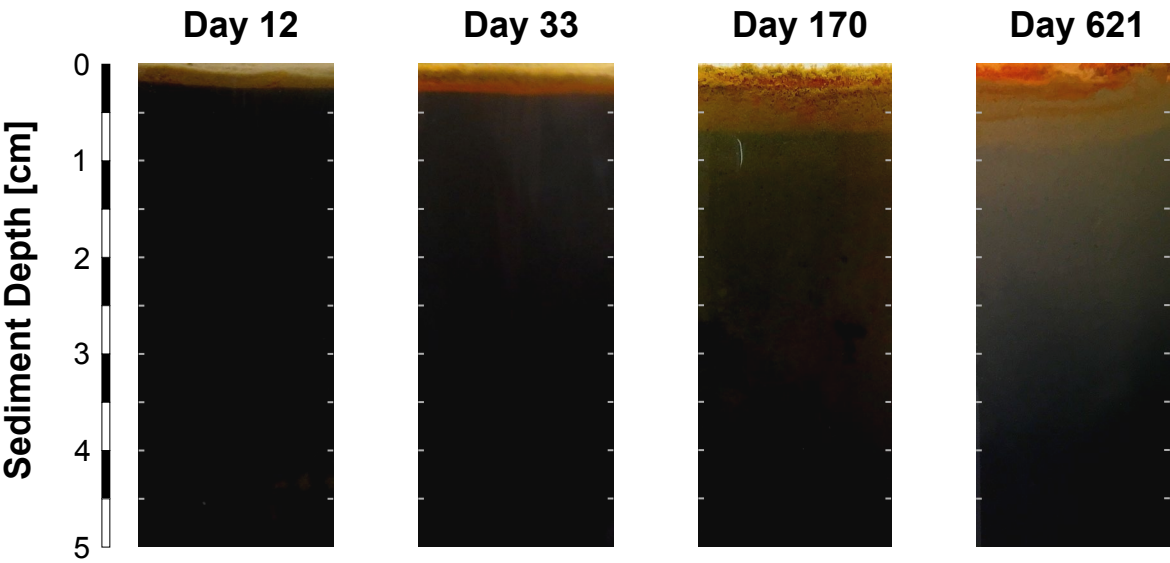

**Figure S11.** Time-series of Core Photographs. The scale bar intervals denote a distance of 0.5 cm.



## S1.9. Time-series of Iron Speciation

**Table S5.** Iron speciation

|               | Depth<br>(cm) | Fe oxides<br>( $\mu\text{mol g}^{-1}$ ) | Fe (II)<br>( $\mu\text{mol g}^{-1}$ ) | AVS<br>( $\mu\text{mol g}^{-1}$ ) |
|---------------|---------------|-----------------------------------------|---------------------------------------|-----------------------------------|
| <b>Day 5</b>  |               |                                         |                                       |                                   |
|               | 0 - 0.5       | 53.15                                   | 139.46                                | 4.00                              |
|               | 0.5 - 1       | 15.37                                   | 166.25                                | 10.75                             |
|               | 1 - 1.5       | 1.99                                    | 171.66                                | 17.38                             |
|               | 1.5 - 2       | 3.85                                    | 169.46                                | 22.59                             |
|               | 2 - 2.5       | 0.20                                    | 170.76                                | 22.20                             |
|               | 2.5 - 3       | 1.22                                    | 168.81                                | 24.05                             |
|               | 3 - 3.5       | 3.13                                    | 173.41                                | 23.56                             |
|               | 3.5 - 4       | 1.05                                    | 176.38                                | 24.57                             |
|               | 4 - 4.5       | 1.72                                    | 177.42                                | 26.23                             |
|               | 4.5 - 5       | 1.48                                    | 172.61                                | 25.03                             |
| <b>Day 12</b> |               |                                         |                                       |                                   |
|               | 0 - 0.5       | 81.55                                   | 120.62                                | 1.97                              |
|               | 0.5 - 1       | 16.58                                   | 151.39                                | 12.16                             |
|               | 1 - 1.5       | 2.87                                    | 157.71                                | 18.41                             |
|               | 1.5 - 2       | 2.58                                    | 164.69                                | 20.10                             |
|               | 2 - 2.5       | 2.71                                    | 167.03                                | 23.57                             |
|               | 2.5 - 3       | 2.71                                    | 175.84                                | 23.04                             |
|               | 3 - 3.5       | 1.27                                    | 164.29                                | 25.17                             |
|               | 3.5 - 4       | 1.35                                    | 174.46                                | 24.27                             |
|               | 4 - 4.5       | 3.54                                    | 175.73                                | 25.35                             |
|               | 4.5 - 5       | 2.45                                    | 177.38                                | 25.31                             |
| <b>Day 18</b> |               |                                         |                                       |                                   |
|               | 0 - 0.5       | 97.02                                   | 122.42                                | 1.71                              |
|               | 0.5 - 1       | 17.45                                   | 145.63                                | 9.16                              |
|               | 1 - 1.5       | 4.40                                    | 159.84                                | 12.64                             |
|               | 1.5 - 2       | 1.53                                    | 168.80                                | 20.84                             |
|               | 2 - 2.5       | 2.47                                    | 165.99                                | 20.93                             |
|               | 2.5 - 3       | 1.72                                    | 174.74                                | 24.62                             |
|               | 3 - 3.5       | 1.12                                    | 175.78                                | 24.85                             |
|               | 3.5 - 4       | 3.60                                    | 177.05                                | 24.72                             |
|               | 4 - 4.5       | 1.41                                    | 173.60                                | 24.42                             |
|               | 4.5 - 5       | 2.12                                    | 173.78                                | 25.60                             |

**Table S5. Iron speciation (continued)**

| Depth<br>(cm) | Fe oxides<br>( $\mu\text{mol g}^{-1}$ ) | Fe (II)<br>( $\mu\text{mol g}^{-1}$ ) | AVS<br>( $\mu\text{mol g}^{-1}$ ) |
|---------------|-----------------------------------------|---------------------------------------|-----------------------------------|
| <b>Day 26</b> |                                         |                                       |                                   |
| 0 - 0.5       | 151.20                                  | 112.78                                | 3.77                              |
| 0.5 - 1       | 21.23                                   | 144.56                                | 7.75                              |
| 1 - 1.5       | 6.64                                    | 150.41                                | 9.44                              |
| 1.5 - 2       | 4.02                                    | 153.04                                | 8.38                              |
| 2 - 2.5       | 3.61                                    | 156.03                                | 8.25                              |
| 2.5 - 3       | 2.13                                    | 173.24                                | 17.94                             |
| 3 - 3.5       | 1.75                                    | 171.95                                | 19.41                             |
| 3.5 - 4       | 2.46                                    | 176.05                                | 25.52                             |
| 4 - 4.5       | 2.39                                    | 175.24                                | 25.37                             |
| 4.5 - 5       | 2.32                                    | 175.17                                | 25.57                             |
| <b>Day 33</b> |                                         |                                       |                                   |
| 0 - 0.5       | 152.78                                  | 114.80                                | 2.52                              |
| 0.5 - 1       | 62.41                                   | 133.31                                | 7.05                              |
| 1 - 1.5       | 5.26                                    | 144.72                                | 9.12                              |
| 1.5 - 2       | 3.99                                    | 147.88                                | 9.53                              |
| 2 - 2.5       | 1.86                                    | 157.70                                | 15.90                             |
| 2.5 - 3       | 2.54                                    | 175.91                                | 16.93                             |
| 3 - 3.5       | 0.31                                    | 174.56                                | 21.32                             |
| 3.5 - 4       | 0.64                                    | 175.51                                | 22.66                             |
| 4 - 4.5       | 1.10                                    | 175.19                                | 22.69                             |
| 4.5 - 5       | 0.39                                    | 175.47                                | 23.48                             |
| <b>Day 40</b> |                                         |                                       |                                   |
| 0 - 0.5       | 196.86                                  | 89.40                                 | 4.50                              |
| 0.5 - 1       | 24.70                                   | 142.89                                | 5.08                              |
| 1 - 1.5       | 7.47                                    | 153.02                                | 9.91                              |
| 1.5 - 2.5     | 10.24                                   | 143.50                                | 8.93                              |
| 2.5 - 3       | 2.29                                    | 162.54                                | 10.45                             |
| 3 - 3.5       | 7.95                                    | 166.50                                | 16.30                             |
| 3.5 - 4.5     | 7.41                                    | 162.06                                | 21.35                             |
| 4.5 - 5       | 5.36                                    | 183.41                                | 23.52                             |

**Table S5. Iron speciation (continued)**

| Depth<br>(cm)  | Fe oxides<br>( $\mu\text{mol g}^{-1}$ ) | Fe (II)<br>( $\mu\text{mol g}^{-1}$ ) | AVS<br>( $\mu\text{mol g}^{-1}$ ) |
|----------------|-----------------------------------------|---------------------------------------|-----------------------------------|
| <b>Day 207</b> |                                         |                                       |                                   |
| 0 - 0.5        | 303.25                                  | 36.88                                 | 2.42                              |
| 0.5 - 1.5      | 29.60                                   | 117.44                                | 3.93                              |
| 1.5 - 2.5      | 3.43                                    | 142.02                                | 5.36                              |
| 2.5 - 3.5      | 3.33                                    | 148.26                                | 14.89                             |
| 3.5 - 4.5      | 1.71                                    | 174.95                                | 22.33                             |
| 4.5 - 5        | 2.97                                    | 189.49                                | 23.64                             |
| <b>Day 621</b> |                                         |                                       |                                   |
| 0 - 0.5        | 484.78                                  | 7.61                                  | 0.27                              |
| 0.5 - 1        | 98.60                                   | 47.59                                 | 0.94                              |
| 1 - 1.5        | 17.50                                   | 89.26                                 | 2.09                              |
| 1.5 - 2        | 14.42                                   | 114.36                                | 3.84                              |
| 2 - 2.5        | 12.73                                   | 145.52                                | 6.80                              |
| 2.5 - 3        | 6.89                                    | 158.41                                | 11.49                             |
| 3 - 3.5        | 3.01                                    | 161.37                                | 18.16                             |
| 3.5 - 4        | 1.22                                    | 166.28                                | 22.44                             |
| 4 - 4.5        | 0.95                                    | 169.97                                | 23.21                             |
| 4.5 - 5        | 1.34                                    | 170.89                                | 23.53                             |
| <b>Control</b> |                                         |                                       |                                   |
| 0 - 0.5        | 2.62                                    | 190.82                                | 37.52                             |
| 0.5 - 1        | 1.70                                    | 187.20                                | 31.76                             |
| 1 - 1.5        | 1.87                                    | 182.64                                | 28.26                             |
| 1.5 - 2        | 2.13                                    | 178.94                                | 25.87                             |
| 2 - 3          | 2.42                                    | 174.36                                | 27.01                             |
| 3 - 4          | 3.92                                    | 173.78                                | 31.11                             |
| 4 - 5          | 3.96                                    | 176.56                                | 31.37                             |

## S1.10. Time-series of Phosphorus Speciation

**Table S6.** Phosphorus speciation

| Depth<br>(cm) |   |     | Exchangeable P<br>( $\mu\text{mol g}^{-1}$ ) | CDB-P<br>( $\mu\text{mol g}^{-1}$ ) | Authigenic P<br>( $\mu\text{mol g}^{-1}$ ) | Detrital P<br>( $\mu\text{mol g}^{-1}$ ) | Organic P<br>( $\mu\text{mol g}^{-1}$ ) |
|---------------|---|-----|----------------------------------------------|-------------------------------------|--------------------------------------------|------------------------------------------|-----------------------------------------|
| Day 5         |   |     |                                              |                                     |                                            |                                          |                                         |
| 0             | - | 0.5 | 0.88                                         | 5.73                                | 4.82                                       | 5.22                                     | N/A                                     |
| 0.5           | - | 1   | 0.44                                         | 5.49                                | 6.11                                       | 6.03                                     | N/A                                     |
| 1             | - | 1.5 | 0.34                                         | 4.67                                | 5.87                                       | 6.29                                     | N/A                                     |
| 1.5           | - | 2   | 0.39                                         | 4.76                                | 5.86                                       | 5.81                                     | N/A                                     |
| 2             | - | 2.5 | 0.48                                         | 4.75                                | 5.33                                       | 6.06                                     | N/A                                     |
| 2.5           | - | 3   | 0.44                                         | 4.75                                | 5.50                                       | 5.56                                     | N/A                                     |
| 3             | - | 3.5 | 0.47                                         | 4.60                                | 5.39                                       | 5.55                                     | N/A                                     |
| 3.5           | - | 4   | 0.48                                         | 4.34                                | 5.26                                       | 4.78                                     | N/A                                     |
| 4             | - | 4.5 | 0.43                                         | 4.73                                | 5.00                                       | 5.69                                     | N/A                                     |
| 4.5           | - | 5   | 0.50                                         | 3.71                                | 5.00                                       | 5.85                                     | N/A                                     |
| Day 12        |   |     |                                              |                                     |                                            |                                          |                                         |
| 0             | - | 0.5 | 0.44                                         | 6.21                                | 6.30                                       | 4.71                                     | N/A                                     |
| 0.5           | - | 1   | 0.26                                         | 4.34                                | 5.55                                       | 4.99                                     | N/A                                     |
| 1             | - | 1.5 | 0.12                                         | 3.09                                | 4.35                                       | 4.46                                     | N/A                                     |
| 1.5           | - | 2   | 0.15                                         | 3.69                                | 4.43                                       | 4.28                                     | N/A                                     |
| 2             | - | 2.5 | 0.29                                         | 4.27                                | 5.87                                       | 5.22                                     | N/A                                     |
| 2.5           | - | 3   | 0.30                                         | 4.68                                | 5.72                                       | 5.39                                     | N/A                                     |
| 3             | - | 3.5 | 0.36                                         | 4.43                                | 6.04                                       | 5.56                                     | N/A                                     |
| 3.5           | - | 4   | 0.44                                         | 4.15                                | 5.93                                       | 5.09                                     | N/A                                     |
| 4             | - | 4.5 | 0.46                                         | 4.27                                | 4.95                                       | 5.47                                     | N/A                                     |
| 4.5           | - | 5   | 0.55                                         | 4.19                                | 4.96                                       | 5.44                                     | N/A                                     |
| Day 18        |   |     |                                              |                                     |                                            |                                          |                                         |
| 0             | - | 0.5 | 0.40                                         | 5.86                                | 6.38                                       | 5.30                                     | N/A                                     |
| 0.5           | - | 1   | 0.16                                         | 4.20                                | 5.41                                       | 7.01                                     | N/A                                     |
| 1             | - | 1.5 | 0.20                                         | 4.52                                | 5.65                                       | 6.13                                     | N/A                                     |
| 1.5           | - | 2   | 0.37                                         | 4.39                                | 5.73                                       | 6.13                                     | N/A                                     |
| 2             | - | 2.5 | 0.20                                         | 4.24                                | 4.57                                       | 6.58                                     | N/A                                     |
| 2.5           | - | 3   | 0.41                                         | 4.29                                | 4.78                                       | 5.42                                     | N/A                                     |
| 3             | - | 3.5 | 0.34                                         | 4.70                                | 5.26                                       | 6.86                                     | N/A                                     |
| 3.5           | - | 4   | 0.48                                         | 4.07                                | 4.41                                       | 6.32                                     | N/A                                     |
| 4             | - | 4.5 | 0.62                                         | 3.89                                | 4.39                                       | 5.41                                     | N/A                                     |
| 4.5           | - | 5   | 0.47                                         | 4.16                                | 5.95                                       | 6.06                                     | N/A                                     |

**Table S6.** Phosphorus speciation (continued)

| Depth<br>(cm) |   |     | Exchangeable P<br>( $\mu\text{mol g}^{-1}$ ) | CDB-P<br>( $\mu\text{mol g}^{-1}$ ) | Authigenic P<br>( $\mu\text{mol g}^{-1}$ ) | Detrital P<br>( $\mu\text{mol g}^{-1}$ ) | Organic P<br>( $\mu\text{mol g}^{-1}$ ) |
|---------------|---|-----|----------------------------------------------|-------------------------------------|--------------------------------------------|------------------------------------------|-----------------------------------------|
| <b>Day 26</b> |   |     |                                              |                                     |                                            |                                          |                                         |
| 0             | - | 0.5 | 1.50                                         | 6.63                                | 5.50                                       | 6.38                                     | 5.14                                    |
| 0.5           | - | 1   | 0.60                                         | 6.91                                | 5.31                                       | 6.44                                     | 5.29                                    |
| 1             | - | 1.5 | 0.56                                         | 7.18                                | 5.38                                       | 6.35                                     | 5.22                                    |
| 1.5           | - | 2   | 0.55                                         | 6.97                                | 4.76                                       | 5.81                                     | 4.84                                    |
| 2             | - | 2.5 | 0.81                                         | 6.31                                | 4.49                                       | 5.49                                     | 4.23                                    |
| 2.5           | - | 3   | 0.76                                         | 7.30                                | 5.35                                       | 6.33                                     | 5.16                                    |
| 3             | - | 3.5 | 0.89                                         | 6.91                                | 5.76                                       | 6.05                                     | 4.94                                    |
| 3.5           | - | 4   | 1.02                                         | 7.19                                | 5.58                                       | 5.60                                     | 4.83                                    |
| 4             | - | 4.5 | 0.93                                         | 7.03                                | 5.73                                       | 5.86                                     | 4.94                                    |
| 4.5           | - | 5   | 1.20                                         | 6.84                                | 5.63                                       | 6.15                                     | 5.14                                    |
| <b>Day 33</b> |   |     |                                              |                                     |                                            |                                          |                                         |
| 0             | - | 0.5 | 0.52                                         | 12.10                               | 5.53                                       | 6.56                                     | 5.50                                    |
| 0.5           | - | 1   | 0.53                                         | 9.92                                | 5.32                                       | 6.38                                     | 5.23                                    |
| 1             | - | 1.5 | 0.43                                         | 6.78                                | 5.03                                       | 6.57                                     | 5.31                                    |
| 1.5           | - | 2   | 0.46                                         | 5.99                                | 5.66                                       | 6.40                                     | 5.66                                    |
| 2             | - | 2.5 | 0.57                                         | 6.91                                | 5.66                                       | 5.91                                     | 5.16                                    |
| 2.5           | - | 3   | 0.48                                         | 7.64                                | 5.36                                       | 6.49                                     | 4.88                                    |
| 3             | - | 3.5 | 0.54                                         | 7.95                                | 5.79                                       | 5.90                                     | 5.13                                    |
| 3.5           | - | 4   | 0.67                                         | 7.57                                | 6.05                                       | 6.04                                     | 5.09                                    |
| 4             | - | 4.5 | 0.86                                         | 7.47                                | 5.87                                       | 6.03                                     | 5.14                                    |
| 4.5           | - | 5   | 0.69                                         | 3.62                                | 5.78                                       | 6.25                                     | 5.21                                    |
| <b>Day 40</b> |   |     |                                              |                                     |                                            |                                          |                                         |
| 0             | - | 0.5 | 0.62                                         | 18.06                               | 5.81                                       | 6.53                                     | 5.24                                    |
| 0.5           | - | 1   | 0.40                                         | 8.42                                | 5.68                                       | 5.96                                     | 5.37                                    |
| 1             | - | 1.5 | 0.71                                         | 7.04                                | 5.99                                       | 5.96                                     | 5.26                                    |
| 1.5           | - | 2.5 | 0.50                                         | 7.41                                | 5.77                                       | 6.15                                     | 5.15                                    |
| 2.5           | - | 3   | 0.56                                         | 7.95                                | 5.75                                       | 5.79                                     | 5.39                                    |
| 3             | - | 3.5 | 0.50                                         | 7.31                                | 5.53                                       | 6.01                                     | 5.12                                    |
| 3.5           | - | 4.5 | 0.51                                         | 7.69                                | 5.55                                       | 6.21                                     | 5.26                                    |
| 4.5           | - | 5   | 0.73                                         | 7.69                                | 5.66                                       | 5.86                                     | 4.95                                    |

**Table S6.** Phosphorus speciation (continued)

| Depth<br>(cm) |   |     | Exchangeable P<br>( $\mu\text{mol g}^{-1}$ ) | CDB-P<br>( $\mu\text{mol g}^{-1}$ ) | Authigenic P<br>( $\mu\text{mol g}^{-1}$ ) | Detrital P<br>( $\mu\text{mol g}^{-1}$ ) | Organic P<br>( $\mu\text{mol g}^{-1}$ ) |
|---------------|---|-----|----------------------------------------------|-------------------------------------|--------------------------------------------|------------------------------------------|-----------------------------------------|
| Day 207       |   |     |                                              |                                     |                                            |                                          |                                         |
| 0             | - | 0.5 | 0.45                                         | 21.03                               | 5.14                                       | 5.52                                     | 5.18                                    |
| 0.5           | - | 1.5 | 0.52                                         | 9.85                                | 5.40                                       | 6.18                                     | 5.40                                    |
| 1.5           | - | 2.5 | 0.51                                         | 6.32                                | 5.69                                       | 6.29                                     | 5.03                                    |
| 2.5           | - | 3.5 | 0.87                                         | 6.41                                | 5.96                                       | 6.08                                     | 5.01                                    |
| 3.5           | - | 4.5 | 0.66                                         | 6.61                                | 5.00                                       | 5.13                                     | 4.12                                    |
| 4.5           | - | 5   | 0.89                                         | 6.80                                | 5.50                                       | 5.89                                     | 4.85                                    |
| Day 621       |   |     |                                              |                                     |                                            |                                          |                                         |
| 0             | - | 0.5 | 0.79                                         | 13.24                               | 4.78                                       | 6.04                                     | 3.97                                    |
| 0.5           | - | 1   | 1.39                                         | 13.58                               | 3.96                                       | 7.28                                     | 4.28                                    |
| 1             | - | 1.5 | 0.56                                         | 3.30                                | 4.25                                       | 7.27                                     | 4.46                                    |
| 1.5           | - | 2   | 0.66                                         | 3.75                                | 4.62                                       | 6.77                                     | 4.16                                    |
| 2             | - | 2.5 | 0.37                                         | 4.78                                | 4.41                                       | 6.72                                     | 4.12                                    |
| 2.5           | - | 3   | 0.39                                         | 4.50                                | 4.79                                       | 6.85                                     | 4.26                                    |
| 3             | - | 3.5 | 0.51                                         | 4.41                                | 4.96                                       | 5.94                                     | 3.73                                    |
| 3.5           | - | 4   | 0.42                                         | 4.68                                | 4.68                                       | 7.33                                     | 4.24                                    |
| 4             | - | 4.5 | 0.31                                         | 4.00                                | 3.72                                       | 7.17                                     | 4.19                                    |
| 4.5           | - | 5   | 0.53                                         | 5.53                                | 5.25                                       | 6.18                                     | 4.12                                    |
| Control       |   |     |                                              |                                     |                                            |                                          |                                         |
| 0             | - | 0.5 | 0.61                                         | 4.25                                | 4.90                                       | 6.50                                     | 3.98                                    |
| 0.5           | - | 1   | 0.84                                         | 4.28                                | 4.76                                       | 6.49                                     | 4.09                                    |
| 1             | - | 1.5 | 0.96                                         | 4.81                                | 5.12                                       | 6.53                                     | 3.55                                    |
| 1.5           | - | 2   | 0.68                                         | 5.52                                | 4.68                                       | 6.72                                     | 4.34                                    |
| 2             | - | 3   | 0.84                                         | 4.41                                | 5.88                                       | 5.25                                     | 4.17                                    |
| 3             | - | 4   | 0.41                                         | 5.25                                | 5.56                                       | 6.17                                     | 4.15                                    |
| 4             | - | 5   | 0.56                                         | 5.39                                | 4.71                                       | 6.67                                     | 4.35                                    |

## References

1. Boudreau, B. P. 1997. Diagenetic models and their implementation. Springer Berlin
2. Berner, R. A. 1980. Early diagenesis: a theoretical approach. Princeton University Press.
3. Burton, E. D., R. T. Bush, and L. A. Sullivan. 2006. Fractionation and extractability of sulfur, iron and trace elements in sulfidic sediments. *Chemosphere* **64**: 1421-1428.
4. Burton, E. D., L. A. Sullivan, R. T. Bush, S. G. Johnston, and A.F. Keene. 2008. A simple and inexpensive chromium-reducible sulfur method for acid-sulfate soils. *Applied Geochemistry* **23**: 2759-2766.
5. Claff, S. R., L. A. Sullivan, E. D. Burton, and R. T. Bush. 2010. A sequential extraction procedure for acid sulfate soils: partitioning of iron. *Geoderma* **155**: 224-230.
6. Fofonoff, N. P., and R. Millard Jr. 1983. Algorithms for the computation of fundamental properties of seawater.
7. Hermans, M., W. Lenstra, S. Hidalgo-Martinez, N. A. van Helmond, R. Witbaard, F. Meysman, S. Gonzalez, and C. P. Slomp. 2019. Abundance and Biogeochemical Impact of Cable Bacteria in Baltic Sea Sediments. *Environmental science & technology* **53**: 7494-7503.
8. Poulton, S. W., and D. E. Canfield. 2005. Development of a sequential extraction procedure for iron: implications for iron partitioning in continentally derived particulates. *Chemical Geology* **214**: 209-221.
9. Rao, A. M., S. Y. Malkin, S. Hidalgo-Martinez, and F. J. Meysman. 2016. The impact of electrogenic sulfide oxidation on elemental cycling and solute fluxes in coastal sediment. *Geochimica et Cosmochimica Acta* **172**: 265-286.
10. Ruttenberg, K. C. 1992. Development of a sequential extraction method for different forms of phosphorus in marine sediments. *Limnology and oceanography* **37**: 1460-1482.
11. Soetaert, K., T. Petzoldt, and F. Meysman. 2010. *Marelac*: Tools for aquatic sciences. R package version.
12. Slomp, C. P., E. H. Epping, W. Helder, and W. V. Raaphorst. 1996. A key role for iron-bound phosphorus in authigenic apatite formation in North Atlantic continental platform sediments. *Journal of Marine Research* **54**: 1179-1205.
